# Supplementary figures and images for: Prevalence, determinants and knowledge about herbal medicine and non-hospital utilisation in southwest Nigeria: a cross-sectional study
Source: PubMed Central journal article supplement — BMJ Open. 2020 Sep 10;10(9):e040769. doi: 10.1136/bmjopen-2020-040769 (PMC7485235; doi:10.1136/bmjopen-2020-040769), 2020-09-10

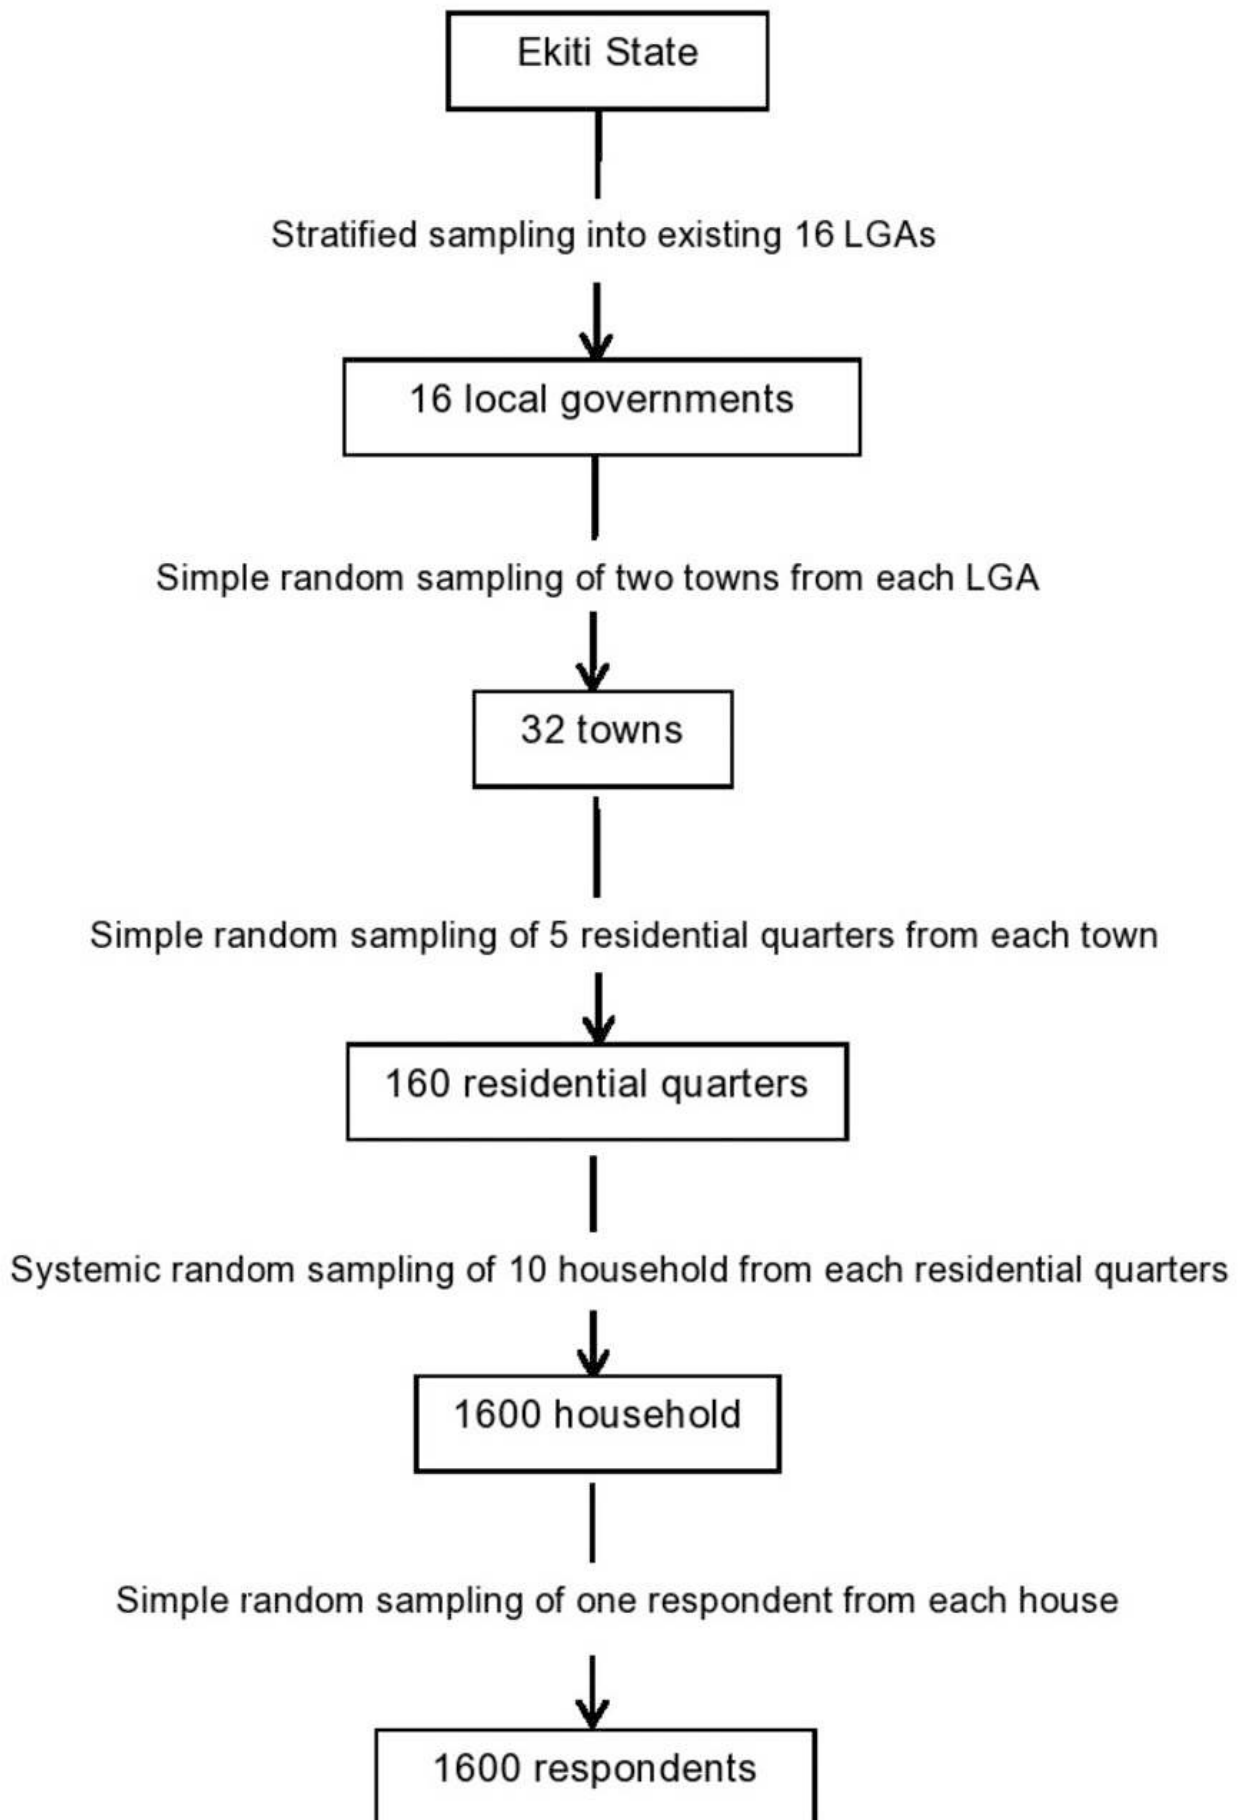

Supplement: bmjopen-2020-040769supp001.pdf [file bmjopen-2020-040769supp001.pdf]
